# Supplementary material for: A dual-mode laser-textured ice-phobic slippery surface: low-voltage-powered switching transmissivity and wettability for thermal management
Source: Royal Society of Chemistry journal article supplement (doi:10.1039/d1nr07940a), 2022-01-01
Supplement: d1nr07940a8.pdf [file d1nr07940a8.pdf]

# A Dual-Mode Laser-Textured Ice-Phobic Slippery Surface: Low-Voltage-Powered Switching Transmissivity and Wettability for Thermal Management

*Chao Chen,<sup>\*,†</sup> Yan Chen,<sup>‡</sup> Hao Yao,<sup>†</sup> Qingrui Song,<sup>§</sup> Chong Jia,<sup>†</sup> Yachao Zhang<sup>\*,‡</sup>*

<sup>†</sup> Department of Materials Physics and New Energy Device, School of Materials Science and Engineering, Hefei University of Technology, Hefei 230009, China

<sup>‡</sup> Department of Polymer Materials and Engineering, School of Materials and Chemical Engineering, Anhui Jianzhu University, 230601, China

<sup>§</sup> Institute of Tribology, Hefei University of Technology, Hefei 230009, China

<sup>‡</sup> CAS Key Laboratory of Mechanical Behavior and Design of Materials, Department of Precision Machinery and Precision Instrumentation, University of Science and Technology of China, Hefei 230026, China

\* Corresponding author: [chaoc11@ustc.edu.cn](mailto:chaoc11@ustc.edu.cn) and [zyachao@ustc.edu.cn](mailto:zyachao@ustc.edu.cn)

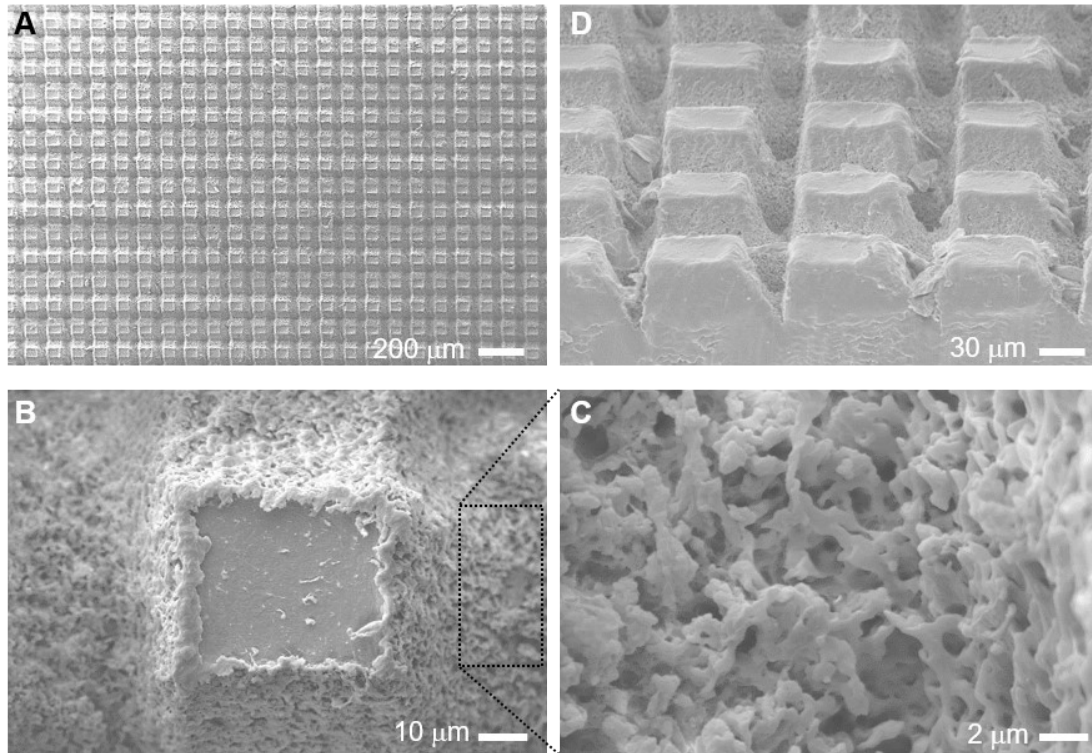

**Figure S1.** (a-c) Top-view SEM images with different magnifications for the laser-textured PTFE platform. (d) Oblique view SEM clip for the resulted LA-PTFE. SEM pictures suggest that laser-ablated PTFE is a hybrid of the uniformly-arrayed micro-pillars together with the micro/nano-porous topography. Accordingly, the superhydrophobic LA-PTFE exhibits remarkable capability of absorption and storage over lubricated paraffin wax depending on a giant capillary force arising from the micro/nano-structures.

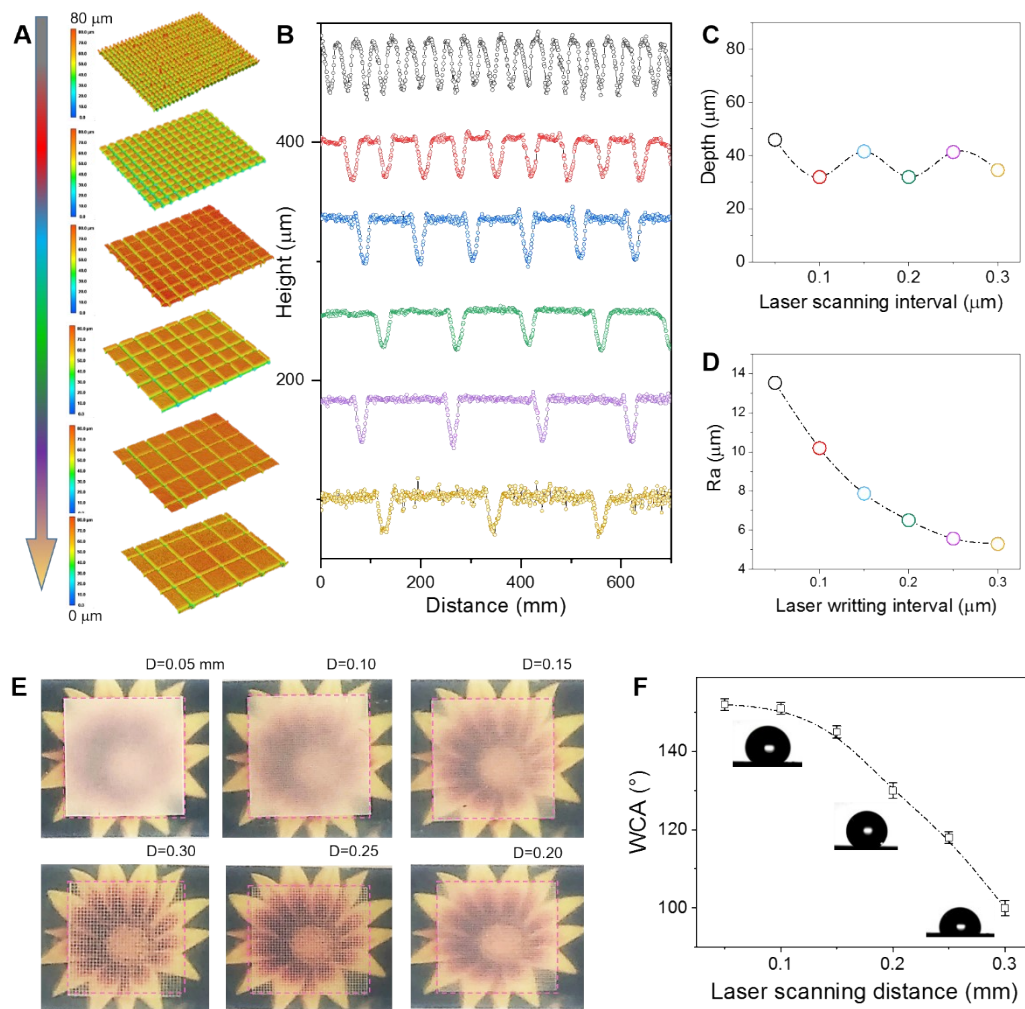

**Figure S2.** (a) 3D images captured by laser microscopy, (b) line-scanning profiles, (c) ablated micro-pillar depth, (d) surface roughness  $R_a$ , (e) Optical visibility, and (f) surface wetting evolution for the six LA-PTFE platforms that were manufactured with fs laser scanning intervals of 0.05, 0.1, 0.15, 0.2, 0.25 and 0.3 mm, respectively. Considering that, a robust slippery surface requires a superhydrophobic porous and reflective platform. In this regard, we select an optimized LA-PTFE ablated with an interval of 0.10, which exhibits an excellent hydrophobicity as well as a moderate light-reflectivity.

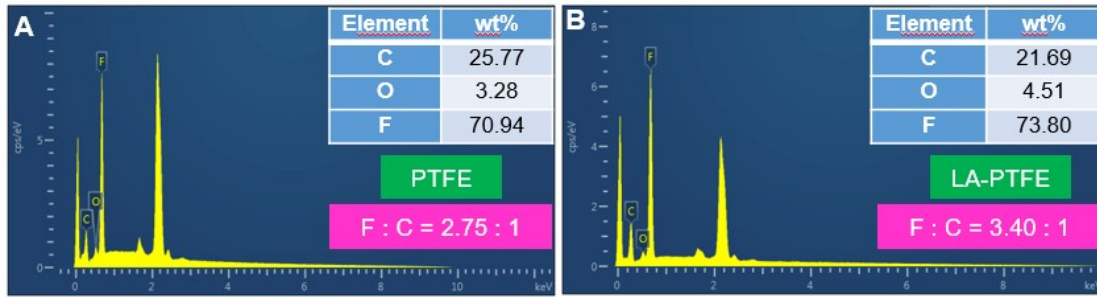

**Figure S3.** EDS mapping for displaying the evolution over the relative atomic ratio of F and C elements in (a) the pristine PTFE and (b) the laser-ablated PTFE. The decrease of C element in LA-PTFE evidenced that fs laser manufacturing technique is not only competent for ablating highly arrayed micro-pillars, but also responsible for inducing a large amount of nano-porous morphology.

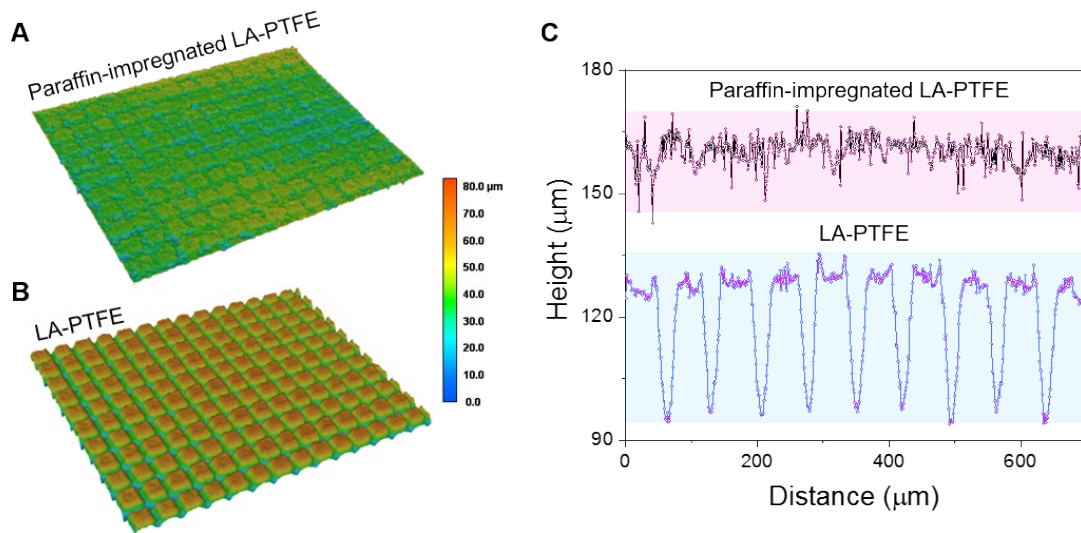

**Figure S4.** 3D imaging photos for the laser-textured PTFE substrate with the interval of 0.15 mm (a) with and (b) without paraffin impregnation. (c) Line scanning profiles for the as-prepared LA-PTFE and the paraffin-impregnated LA-PTFE. By subtracting the paraffin-impregnated LA-PTFE by the LA-PTFE counterpart, we can harvest the thickness of the impregnated paraffin, which is roughly estimated as 33.5  $\mu\text{m}$ .

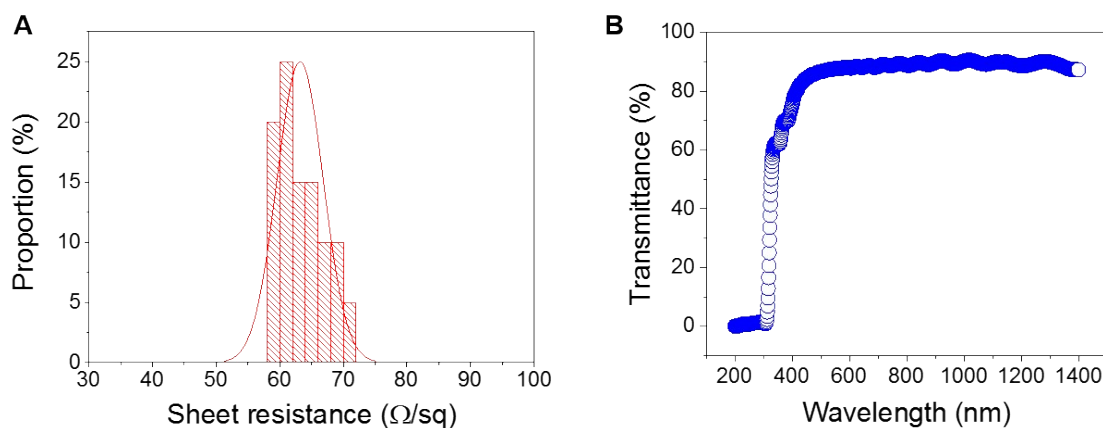

**Figure S5.** Measurements of (a) sheet resistance and (b) transmittance in a wavelength range of 180-1400 nm for the silver nanowires woven thin-film heater. The result shows that current heater is highly transparent and conductive for serving as a flexible/portable electric-induced-heating source.

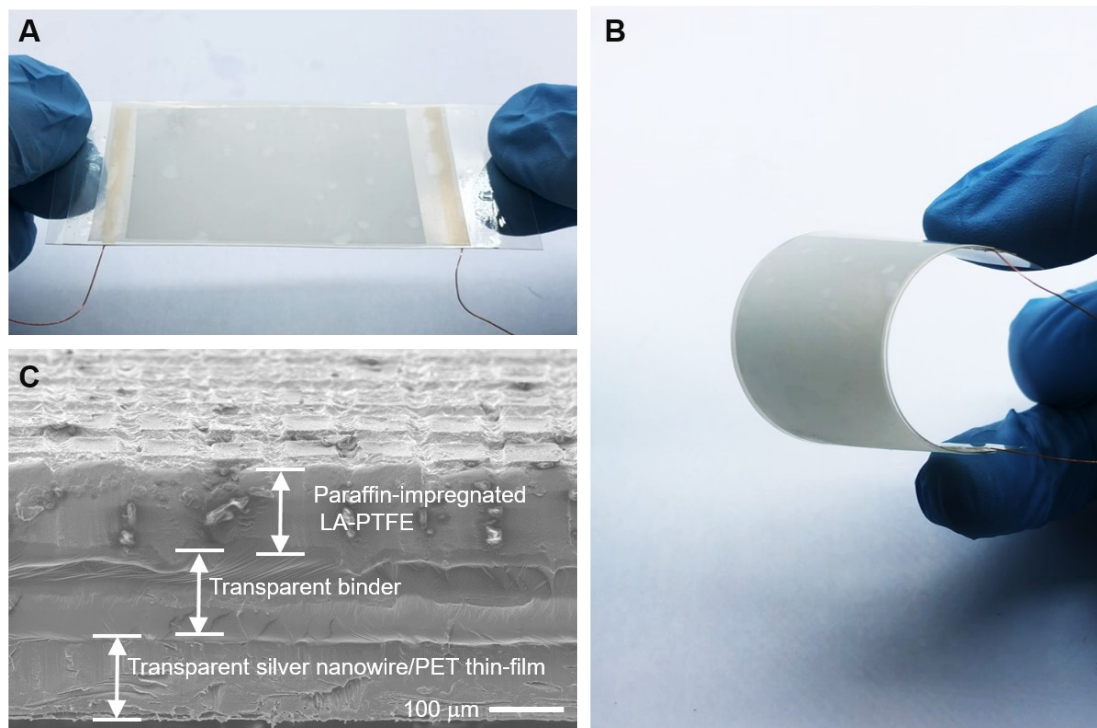

**Figure S6.** Digital pictures for displaying (a) the planar and (b) the bent electric-powered DM-SLIPS. (c) SEM clip for characterizing the architecture of DM-SLIPS composed of top-layer paraffin-impregnated LA-PTFE, middle-layer adhesive tape and bottom-layer silver nanowires thin-film heater. They have the identical thickness of  $\sim 100 \mu\text{m}$ , signifying the DM-SLIPS has a total height of  $\sim 300 \mu\text{m}$ .

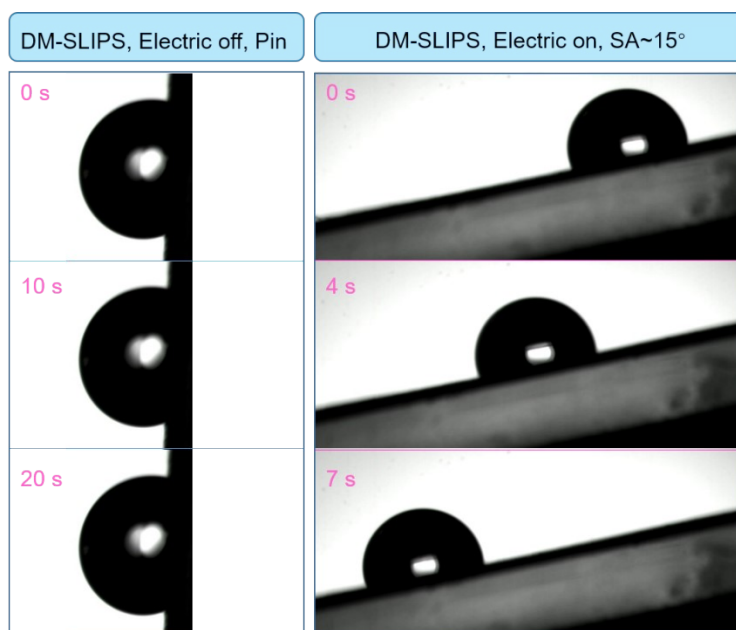

**Figure S7.** Time-lapse clips for displaying the typical droplet (10  $\mu\text{L}$ ) sliding behavior on DM-SLIPS without (left one) and with (right one) Joule-heat. The result showcasing that the rough ASS system presents ultra-adhesive force and the smooth ALS system unfolds a lower hysteresis.

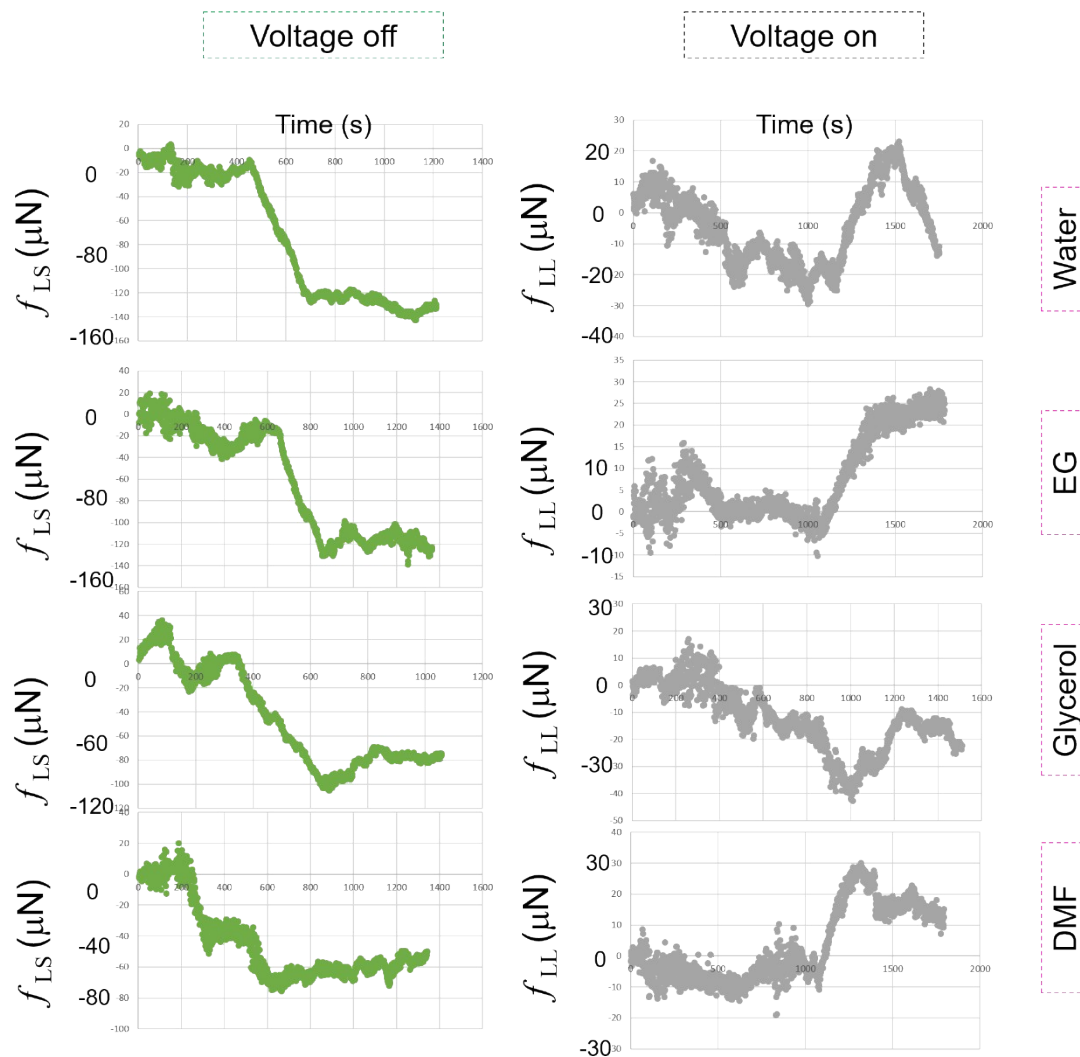

**Figure S8.** Quantitative measurements for recording the  $f_{LL}$  and  $f_{SL}$  over diverse liquids on horizontal charging/discharging DM-SLIPS, including water, glycerol, ethylene glycol (EG) and dimethyl formamide (DMF).

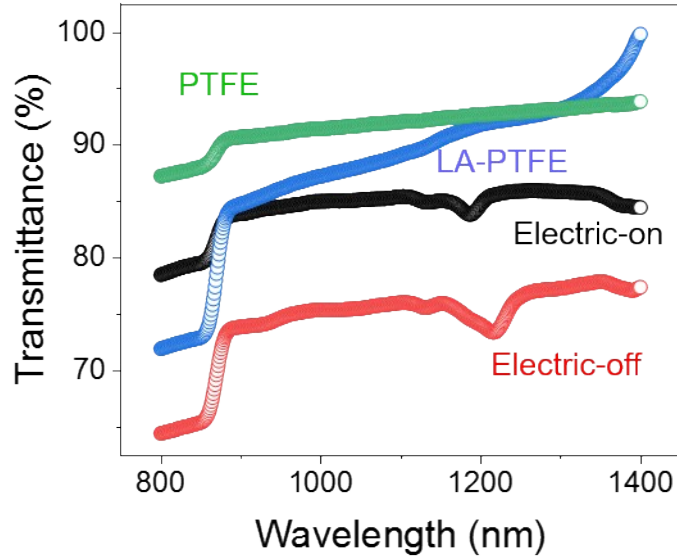

**Figure S9.** Transmittance spectrums for pristine PTFE, laser-ablated PTFE, and DM-SLIPS with and without Joule-heat. The DM-SLIPS has a minimum transparency compared to the pristine PTFE and LA-PTFE, thereby displaying a best cooling performance. In addition, light irradiating on DM-SLIPS can be switched between release mode and lock mode so as to realizing the controllable solar energy input according to the user's request.

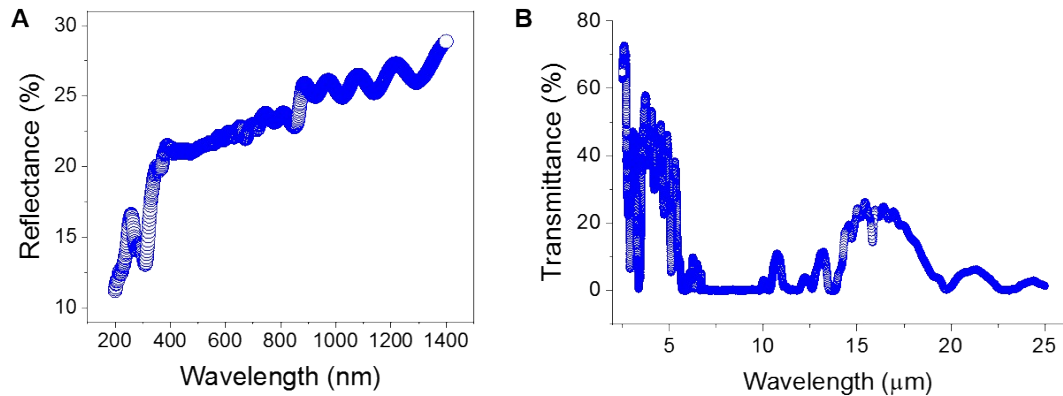

**Figure S10.** (a) Reflectance spectrum in a wavelength range of 180-1400 nm and (b) Transmittance spectrum in a wavelength range of 2-25  $\mu\text{m}$ . The result unfolds that silver nanowire thin-film heater is a transparent feature in the visible range but a reflective appearance in the MIR scope (8-13  $\mu\text{m}$ ), signifying the thermal insulation property assigned on DM-SLIPS is derived from the embedded silver nanowires with far smaller IR emittance ( $\sim 0.03$ ). In ultra-cold winter, the electricity-induced Joule-heat could replenish the indoor temperature and meanwhile the release mode of electric-powered DM-SLIPS allows the solar energy entrance but reject its leakage towards outer space (lower IR emittance), so these merits enable DM-SLIPS to cope with energy crisis in some special regions having extremely-cold climates.

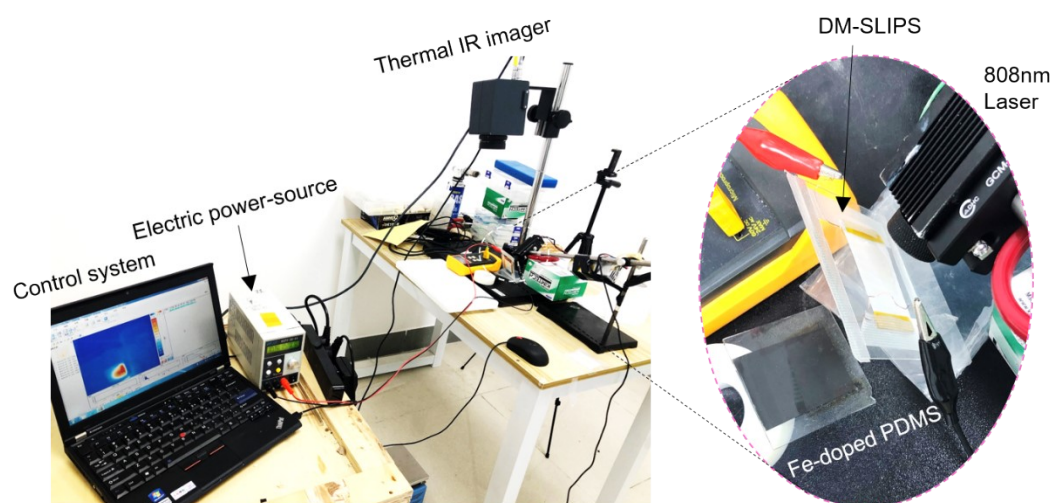

**Figure S11.** Digital photograph for the home-made system for a proof-of-concept thermal management, which is composed of a computer-connected thermal IR imager, an electric power source, 808 nm laser and a piece of Fe<sub>3</sub>O<sub>4</sub>-doped PDMS membrane. By loading/discharging the electric-stimuli, the DM-SLIPS is finely-tuned between transparent and opaque for controlling the solar energy input on demand.

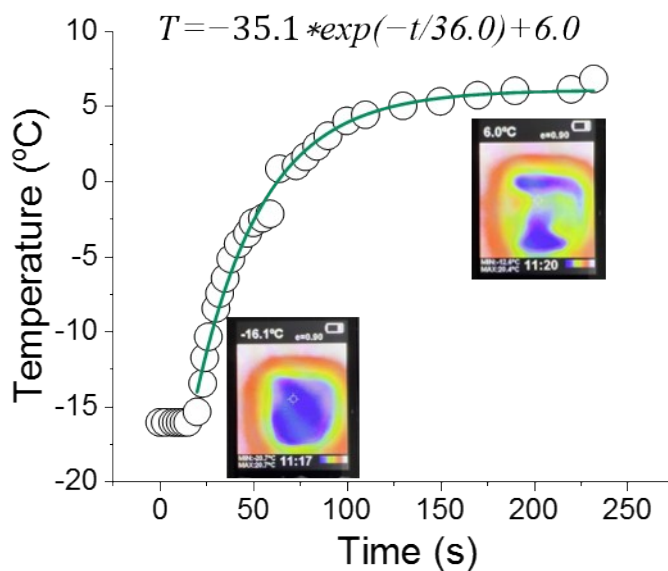

**Figure S12.** Temperature-time curve of DM-SLIPS recorded by Joule heating from its minimum frozen state to the ice melting state.



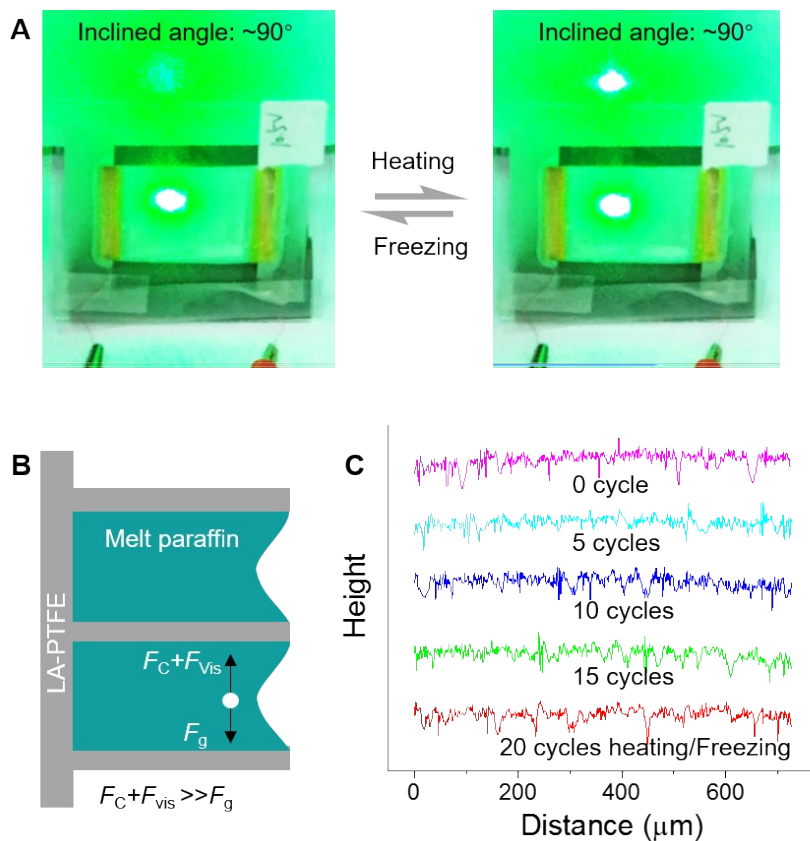

**Figure S13.** (a) Digital clips for evidencing the reversible transparency switching through cyclic heating/freezing operations. (b) A proposed mechanical model for the liquefied paraffin dwelling on an erect DM-SLIPS. (c) 3D laser profiles for verifying the durability of DM-SLIPS suffering from cyclic heating/freezing maneuvering.

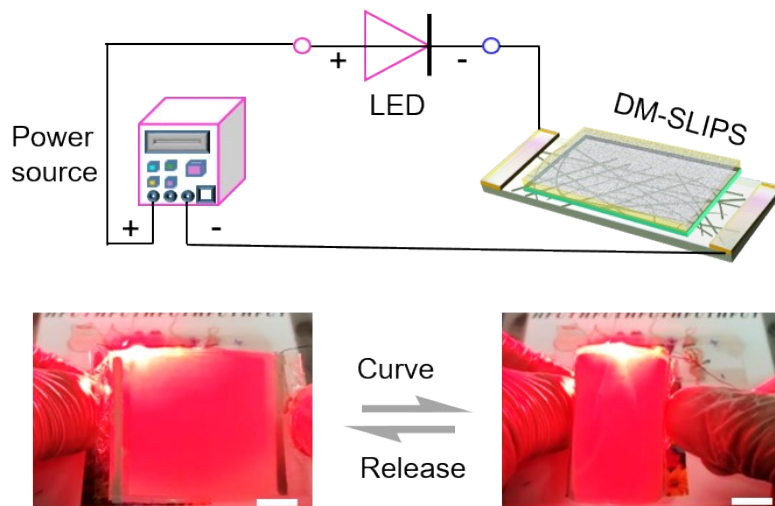

**Figure S14.** The upper schematic diagram displaying the home-made flexibility test system and the lower digital clips presenting the good apparent flexibility of electric-loading DM-SLIPS; The scale bar is 1 cm.

| <b>(1) Cost Analysis for LA-PTFE</b>                                                                                                                                                                                                                                                                                                                                                                                                                                                                                                                                                                                                                         |                                                              |                              |                                                                |
|--------------------------------------------------------------------------------------------------------------------------------------------------------------------------------------------------------------------------------------------------------------------------------------------------------------------------------------------------------------------------------------------------------------------------------------------------------------------------------------------------------------------------------------------------------------------------------------------------------------------------------------------------------------|--------------------------------------------------------------|------------------------------|----------------------------------------------------------------|
| Fs Laser ablation (including laser, water-cooling and air conditioner systems, 6 kW)                                                                                                                                                                                                                                                                                                                                                                                                                                                                                                                                                                         | Time-cost for processing 6×6 cm <sup>2</sup> LA-PTFE (1.5 h) | Electric charge (1.5 ¥/kW·h) | Cost ①: 6 kW×1.5 h×1.5 ¥/kW·h = <b>13.5 ¥</b>                  |
| <b>(2) Cost Analysis for paraffin lubrication</b>                                                                                                                                                                                                                                                                                                                                                                                                                                                                                                                                                                                                            |                                                              |                              |                                                                |
| Paraffin wax ~ 0.03g×0.809 ¥/g = 0.024 ¥                                                                                                                                                                                                                                                                                                                                                                                                                                                                                                                                                                                                                     | Thermal-spin-coating period (60 s), power (0.07 kW)          | Electric charge (1.5 ¥/kW·h) | Cost②: 0.024 ¥ + 0.07 kW×0.0166 h×1.5 ¥/kW·h = <b>0.0357 ¥</b> |
| <b>(3) Cost Analysis for silver nanowire coating and Bonding</b>                                                                                                                                                                                                                                                                                                                                                                                                                                                                                                                                                                                             |                                                              |                              |                                                                |
| Synthesize silver nanowires (16 mg): (Materials expenses) (NaCl) 0.0613 g×0.031 ¥/g = 0.002 ¥; (NaBr) 0.056 g×0.134 ¥/g = 0.0075 ¥; (PVP) 0.70 g×0.36 ¥/g = 0.252 ¥; (AgNO <sub>3</sub> ) 2.1 g×2.6 ¥/g = 5.46 ¥; (Electric charge) Oil bath heating 1.25 h×2 kW×1.5 ¥/kW·h = <b>3.75 ¥</b>                                                                                                                                                                                                                                                                                                                                                                  |                                                              |                              |                                                                |
| Silver nanowires ink (16 mL, 1mg/mL): 32 mg HPMC+Sago-dispersant (v/v 0.0025%)+Sago-flattening agent (v/v 0.0025%) ≈ 0.06 ¥;                                                                                                                                                                                                                                                                                                                                                                                                                                                                                                                                 |                                                              |                              |                                                                |
| Silver nanowire heater bonding (6×6 cm <sup>2</sup> ): PET film (6×6 cm <sup>2</sup> ) = <b>0.0005 ¥</b> ; PDMS adhesive layer ≈ <b>0.004 ¥</b> ; Silver paste for electrodes ~2 mg×0.013 ¥/mg= <b>0.026 ¥</b><br>; Here, the material expense for 1 mL SNW ink is 5.7815 ¥/16 mL ≈ 0.36 ¥/mL and thus the material cost for preparing 1 cm <sup>2</sup> silver nanowire film is calculated as 0.36 ¥ divided by (21.0×29.7 cm <sup>2</sup> ), that is, 0.0006 ¥/cm <sup>2</sup> . Accordingly, the cost for silver nanowire heater with area of 6×6 cm <sup>2</sup> is <b>0.0216 ¥</b> ; Electric charge for oven heating 7h×0.6kW×1.5 ¥/kW·h= <b>6.3 ¥</b> |                                                              |                              |                                                                |
| <b>Total Cost Analysis</b>                                                                                                                                                                                                                                                                                                                                                                                                                                                                                                                                                                                                                                   |                                                              |                              |                                                                |
| 13.5 ¥ (electric charge-LA-PTFE)+0.0357 ¥ +3.75 ¥ (electric charge-oil bath)+0.0005 ¥ (PET platform)+0.004 ¥ (PDMS adhesive layer for bonding)+0.0216 ¥ (material expense for silver nanowires film)+6.3 ¥ (electric charge for heating oven)+0.026 ¥ (silver paste) = 23.6 ¥ = 3.7 \$                                                                                                                                                                                                                                                                                                                                                                       |                                                              |                              |                                                                |

**Figure S15.** Cost analysis over a typical DM-SLIPS (6 cm×6 cm) by combining the Fs laser scanning technique

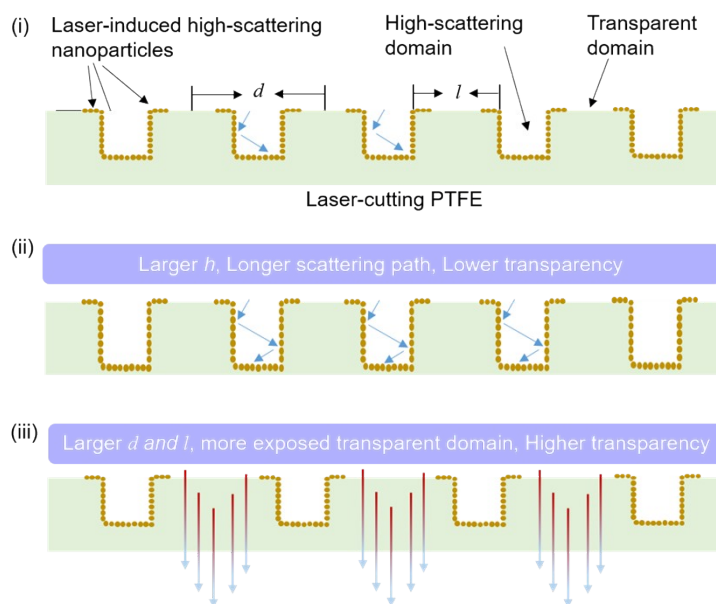

**Figure S16.** Schematic diagram for showing the influence of laser-cutting parameters on the topographical and optical evolution of DM-SLIPS.
